# Supplementary material for: Facile synthesis of 3D flower-like porous NiO architectures with an excellent capacitance performance
Source: Royal Society of Chemistry journal article supplement (doi:10.1039/c5ra05231a), 2015-01-01
Supplement: c5ra05231a1.pdf [file c5ra05231a1.pdf]

## Electronic Supplementary Information

### Facile synthesis of 3D flower-like porous NiO architectures with an excellent capacitance performance

Xijian Liu,<sup>\*ab</sup> Jiachang Zhao,<sup>a</sup> Yunjiu Cao,<sup>ab</sup> Wenyao Li,<sup>ab</sup> Yangang Sun,<sup>\*a</sup> Jie Lu,<sup>a</sup> Yong Men<sup>a</sup> and Junqing Hu<sup>b</sup>

<sup>a</sup>College of Chemistry and Chemical Engineering, Shanghai University of Engineering Science, Shanghai, 201620, China; E-mail: liuxijian@sues.edu.cn; E-mail: ygsun021@yahoo.com

<sup>b</sup>State Key Laboratory for Modification of Chemical Fibers and Polymer Materials, College of Materials Science and Engineering, Donghua University, Shanghai 201620, China.

#### Supplementary Table and Figures

**Tab.S1** A comparison of various published results of Ni-based supercapacitors

| Electrode Materials                                    | Specific Capacitance                       | Ref.      |
|--------------------------------------------------------|--------------------------------------------|-----------|
| 3D flower-like porous NiO                              | 1609 F/g at 2 A/g or<br>1574 F/g at 5 mV/s | This work |
| NiO nanoparticles                                      | 182 F/g at 4.4 A/g                         | 1         |
| NiO nanowires                                          | 670 F/g at 1 A/g                           | 2         |
| porous NiO nanotube arrays                             | 675 F/g at 2 A/g                           | 3         |
| porous NiO nanocolumns                                 | 390 F/g at 5 A/g                           | 4         |
| NiO nanoplates                                         | 285 F/g at 5 A/g                           | 4         |
| NiO nanoslices                                         | 176 F/g at 5 A/g                           | 4         |
| porous NiO nanosheets                                  | 1025 F/g at 3 A/g                          | 5         |
| ordered mesoporous NiO film                            | 590 F/g at 2.5 mV/s                        | 6         |
| porous NiO hollow spheres                              | 282 F/g at 2 A/g                           | 7         |
| flowerlike NiO hollow nanosphere                       | 770 F/g at 2 A/g                           | 8         |
| hierarchical porous NiO nanoflowers                    | 265 F/g at 5 mV/s                          | 9         |
| NiO nanoflower                                         | 333 F/g at 2 A/g                           | 10        |
| flower-like $\alpha$ -Ni(OH) <sub>2</sub> microspheres | 1297 F/g at 2 A/g                          | 11        |

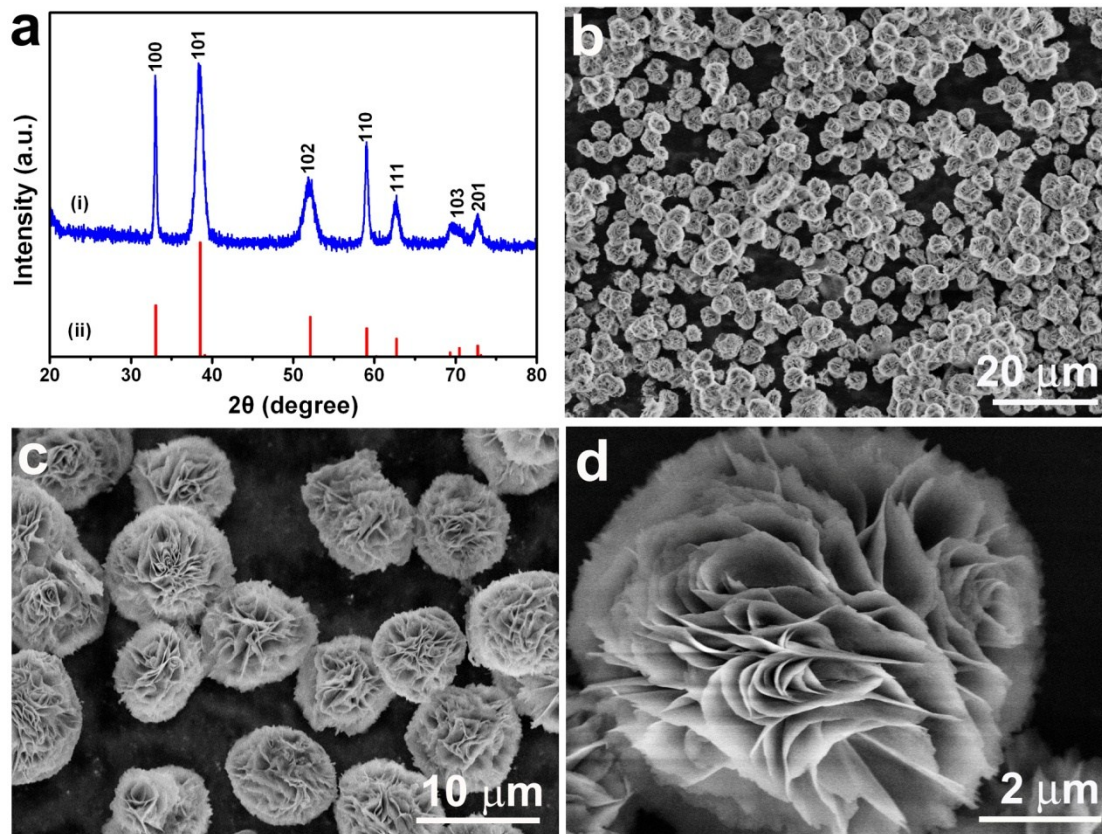

**Fig.S1** (a) XRD patterns of the as-synthesized 3D hierarchical Ni(OH)<sub>2</sub> flower-like architectures (i) and the Ni(OH)<sub>2</sub> powders from the JCPDS card (ii) (No:14-0117), respectively.(b, c and d) Low-, medium- and high- magnification SEM images of as-synthesized 3D hierarchical Ni(OH)<sub>2</sub> flower-like architectures.

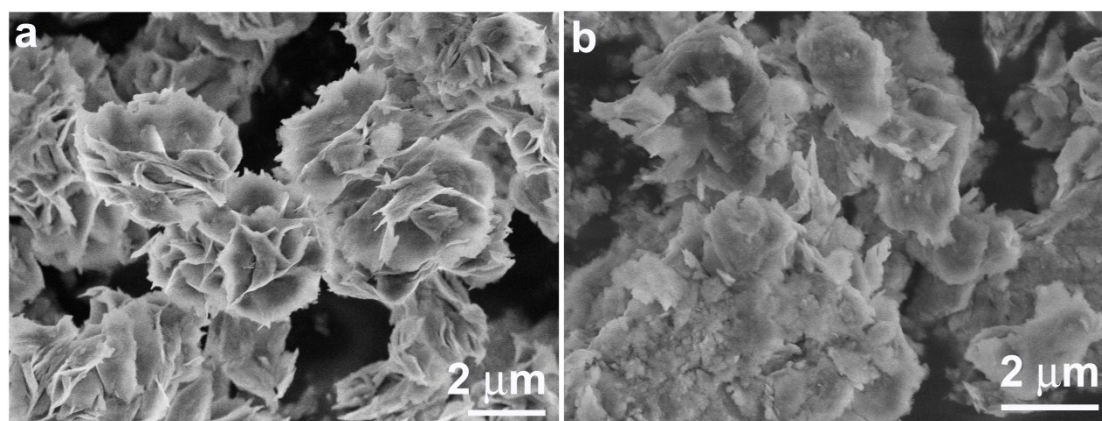

**Fig.S2** SEM images of Ni(OH)<sub>2</sub> structures synthesized without glucose (a) and with 50 mg glucose (b).

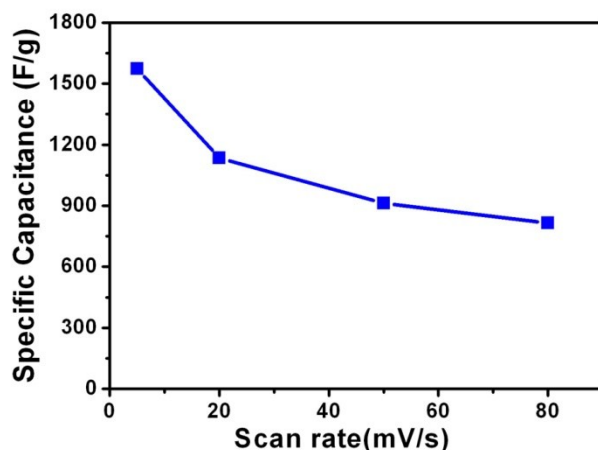

Fig.S3 Specific capacitances of the as-synthesized 3D flower-like porous NiO at different scan rates.

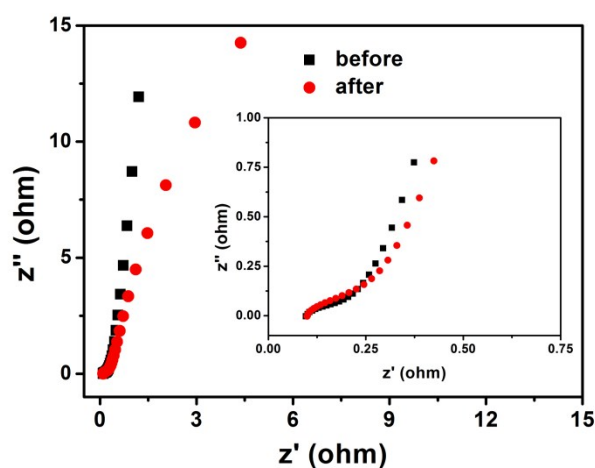

Fig.S4 Electrochemical impedance spectra before and after cycling

## References

1. A. Allagui, A. H. Alami, E. A. Baranova and R. Wuethrich, *J. Power Sources*, 2014, **262**, 178-182.
2. B. Vidhyadharan, N. K. M. Zain, I. I. Misnon, R. Abd Aziz, J. Ismail, M. M. Yusoff and R. Jose, *J. Alloy Compd.*, 2014, **610**, 143-150.
3. F. Cao, G. X. Pan, X. H. Xia, P. S. Tang and H. F. Chen, *J. Power Sources*, 2014, **264**, 161-167.
4. X. Zhang, W. Shi, J. Zhu, W. Zhao, J. Ma, S. Mhaisalkar, T. L. Maria, Y. Yang, H. Zhang, H. H. Hng and Q. Yan, *Nano Res.*, 2010, **3**, 643-652.
5. X. Sun, G. Wang, J. Y. Hwang and J. Lian, *J. Mater. Chem.*, 2011, **21**, 16581-16588.
6. D.-D. Zhao, M. W. Xu, W.-H. Zhou, J. Zhang and H. L. Li, *Electrochim. Acta*, 2008, **53**, 2699-2705.
7. X. Yan, X. Tong, J. Wang, C. Gong, M. Zhang and L. Liang, *Mater. Lett.*, 2013, **95**, 1-4.

8. C. Y. Cao, W. Guo, Z. M. Cui, W. G. Song and W. Cai, *J. Mater. Chem.*, 2011, **21**, 3204-3209.
9. Y. Ren and L. Gao, *J. Am. Ceram. Soc.*, 2010, **93**, 3560-3564.
10. S.I. Kim, J. S. Lee, H. J. Ahn, H. K. Song and J. H. Jang, *Acs Appl. Mater. Interfaces*, 2013, **5**, 1596-1603.
11. H. Du, L. Jiao, K. Cao, Y. Wang and H. Yuan, *Acs Appl. Mater. Interfaces*, 2013, **5**, 6643-6648.
